# Supplementary material
Source: PubMed Central journal article supplement (PMC2936496)
Supplement: Supp_Data.pdf [file Supp_Data.pdf]

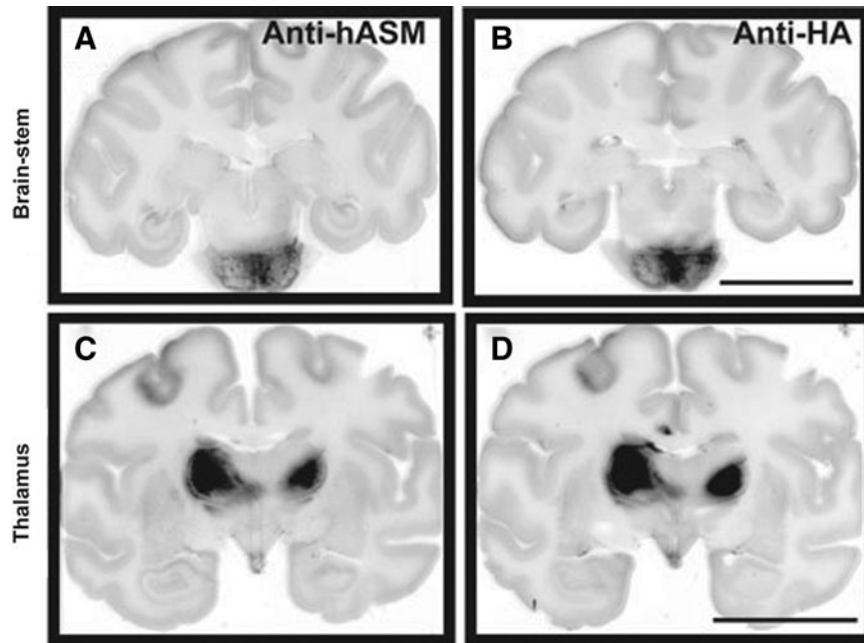

**SUPPLEMENTARY FIG. 7.** Colocalization of hASM and HA staining in thalamus and brainstem regions. Similar immunoreactive regions stained for hASM or HA epitope in brainstem-infused regions (A and B: *left*, hASM, 0.817 cm<sup>2</sup>; *right*, HA, 0.790 cm<sup>2</sup>) and in thalamus-infused regions (C and D: *left*, hASM, 0.652 cm<sup>2</sup>; and HA, 0.616 cm<sup>2</sup>; *right*, hASM, 0.303 cm<sup>2</sup>; and HA, 0.277 cm<sup>2</sup>). Scale bars: (A–D) 2 cm.
